# Supplementary material for: Veteran families with complex needs: a qualitative study of the veterans’ support system
Source: Springer Nature journal article supplement (doi:10.1186/s12913-021-07368-2), 2022-01-15
Supplement: MOESM4 [file 20035130]

Additional file 4. Saturation assessment of inductive thematic analysis

|                              | Data Collection Event |     |     |           |     |             |             |      |      |             |             |      |      |      |      |      |      |      |      |      |
|------------------------------|-----------------------|-----|-----|-----------|-----|-------------|-------------|------|------|-------------|-------------|------|------|------|------|------|------|------|------|------|
|                              | FG1                   | FG2 | FG3 | FG4       | IN1 | IN2         | IN3         | IN4  | IN5  | IN6         | IN7         | IN8  | IN9  | IN10 | IN11 | IN12 | IN13 | IN14 | IN15 | IN16 |
| <b>New Codes</b>             | 39                    | 6   | 12  | 5         | 0   | 2           | 0           | 1    | 0    | 0           | 0           | 0    | 0    | 0    | 0    | 0    | 0    | 0    | 0    | 0    |
| <b>Base Codes</b>            |                       |     |     | <b>62</b> |     |             |             |      |      |             |             |      |      |      |      |      |      |      |      |      |
| <b>Run length = 2</b>        |                       |     |     |           |     |             |             |      |      |             |             |      |      |      |      |      |      |      |      |      |
| <b>New Codes in Run</b>      |                       |     |     |           |     | 2           | 2           | 1    | 1    | 0           | 0           | 0    | 0    | 0    | 0    | 0    | 0    | 0    | 0    | 0    |
| <b>Saturation Ratio* (%)</b> |                       |     |     |           |     | <b>3.23</b> | 3.23        | 1.61 | 1.61 | <b>0.00</b> | 0.00        | 0.00 | 0.00 | 0.00 | 0.00 | 0.00 | 0.00 | 0.00 | 0.00 | 0.00 |
| <b>Run length = 3</b>        |                       |     |     |           |     |             |             |      |      |             |             |      |      |      |      |      |      |      |      |      |
| <b>New Codes in Run</b>      |                       |     |     |           |     |             | 2           | 3    | 1    | 1           | 0           | 0    | 0    | 0    | 0    | 0    | 0    | 0    | 0    | 0    |
| <b>Saturation Ratio* (%)</b> |                       |     |     |           |     |             | <b>3.23</b> | 4.84 | 1.61 | 1.61        | <b>0.00</b> | 0.00 | 0.00 | 0.00 | 0.00 | 0.00 | 0.00 | 0.00 | 0.00 | 0.00 |

Notes. FG = Focus Group. IN = Interview. \*Saturation Ratio = number of new codes in run divided by the number of base codes.
